# Supplementary material for: MLL fusion proteins link transcriptional coactivators to previously active CpG-rich promoters
Source: PubMed Central journal article supplement — Nucleic Acids Res. 2014 Jan 23;42(7):4241–56. doi: 10.1093/nar/gkt1394 (PMC3985622; doi:10.1093/nar/gkt1394), 2014-01-23
Supplement: supp_gkt1394_nar-02019-m-2013-File009.pdf [file supp_gkt1394_nar-02019-m-2013-File009.pdf]

## Supplemental Information

# MLL fusion proteins link transcriptional coactivators to previously active CpG-rich promoters

Hiroshi Okuda, Marie Kawaguchi, Akinori Kanai, Hirotaka Matsui, Takeshi Kawamura, Toshiya Inaba, Issay Kitabayashi, Akihiko Yokoyama

Figure S1. Expression profiles of PCE-leukemic cells

Figure S2. Characteristics of the nucleosomes coprecipitated with P' and P'C mutants.

Figure S3. Frequencies of each histone modification in P'- and P'C-bound nucleosomes.

Figure S4. The P'C'(FBXL11) mutant protein in the input chromatin and precipitate.

Figure S5. Profiles of the MLL target genes in ML-2 cells

Figure S6. Schematic representation of the GAL4-ENL fusion proteins

Table S1. List of MLL-AF6 target genes in ML-2 cells

Table S2. Antibodies used in this study

Table S3. Custom-made probes used for ChIP- and CIRA-qPCR in this study

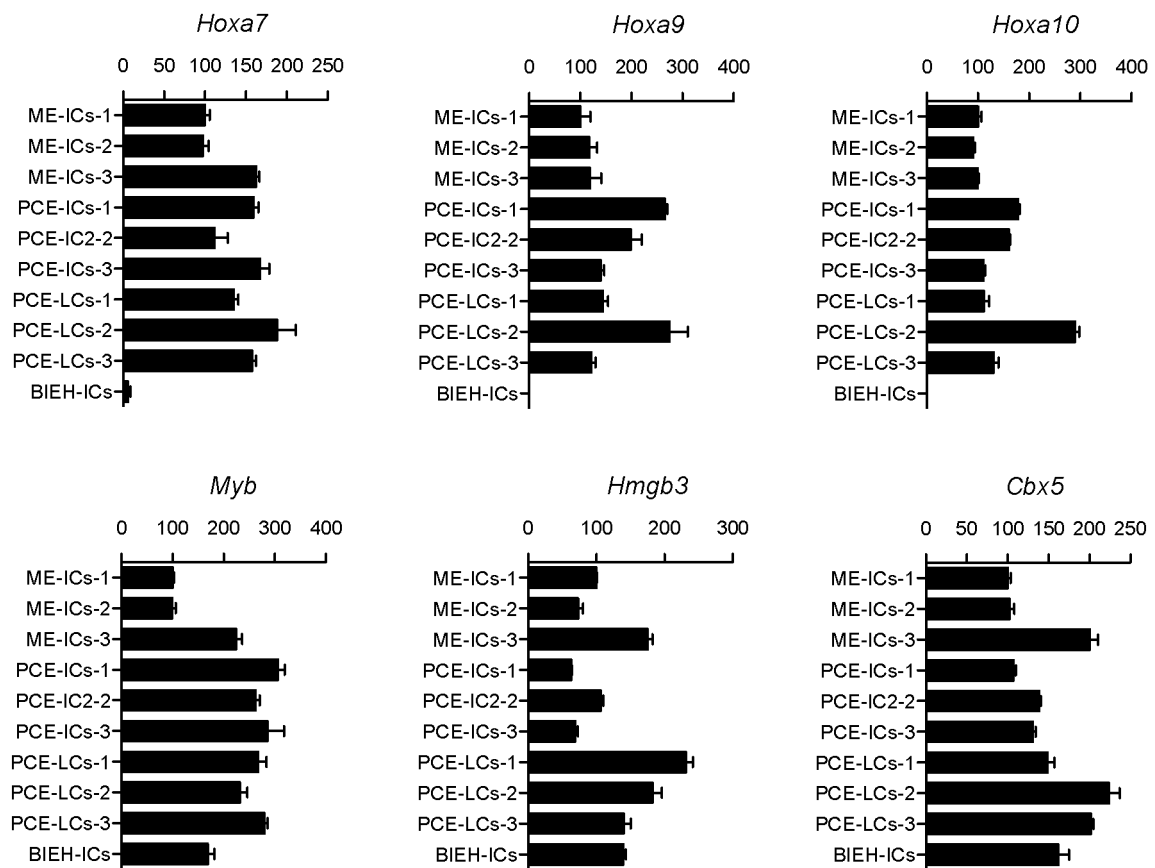

**Figure S1. Expression profiles of PCE-leukemic cells**

Expression profiles of leukemia-associated genes in PCE-leukemia cells (PCE-LCs). Gene expression in three independent PCE-induced leukemia cell lines was analyzed by RT-qPCR for the indicated genes. MLL-ENL-immortalized cells (ME-ICs), PCE-ICs, and BiEH-ICs are included for comparison. The expression levels are expressed relative to ME-ICs-1 arbitrarily set as 100.

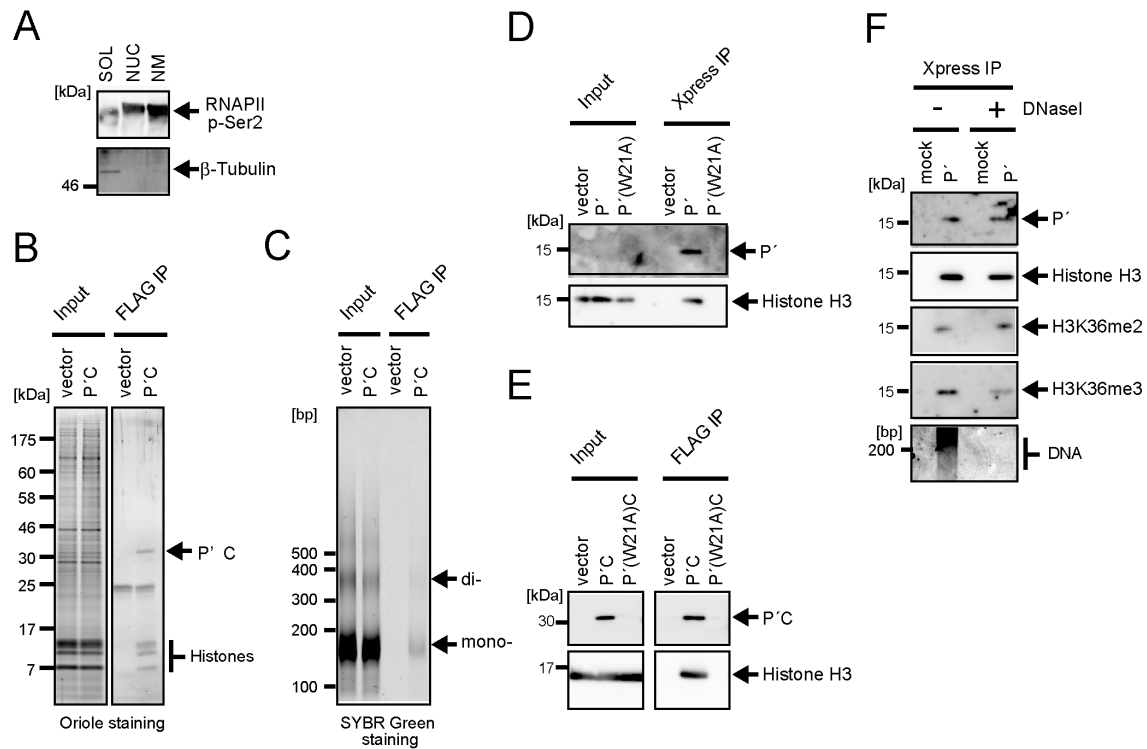

**Figure S2. Characteristics of the nucleosomes coprecipitated with P' and P'C mutants.**

- Distribution of endogenous RNAPII (phosphorylated at the Ser2 residue in its CTD) and β-tubulin proteins in the three subfractions. 293T cells were subfractionated into the soluble fraction (SOL), the nucleosome fraction (NUC), and the nuclear matrix fraction (NM) as in Figure 2E.
- Proteins in the P'C-nucleosome complex. Proteins coprecipitated with P'C were visualized by Oriole staining.
- DNAs in the P'C-nucleosome complex. DNAs coprecipitated with P'C were visualized by SYBR Green staining.
- P'(W21A) does not coprecipitate nucleosomes. The nucleosome fractions of P'- or P'(W21A)-expressing cells were analyzed as in Figure 2I. P' proteins were precipitated using anti-Xpress antibody. Nucleosomes were visualized by anti-histone H3 antibody.
- P'(W21A)C does not coprecipitate nucleosomes. The nucleosome fractions of P'C- or P'(W21A)C-expressing cells were analyzed as in Figure 2I. P'C proteins were precipitated using anti-FLAG antibody. Nucleosomes were visualized by anti-histone H3 antibody.

F) The role of DNAs in P'-nucleosome interaction. The precipitates prepared as in Figure 2I were treated with DNase I (300 kunits/mL) for 10 min and washed to remove unbound material. Nucleosomes were visualized by antibodies specific for H3K36me2 and H3K36me3 modification or by anti-histone-H3 antibodies. DNAs coprecipitated with P' were visualized by SYBR Green staining.

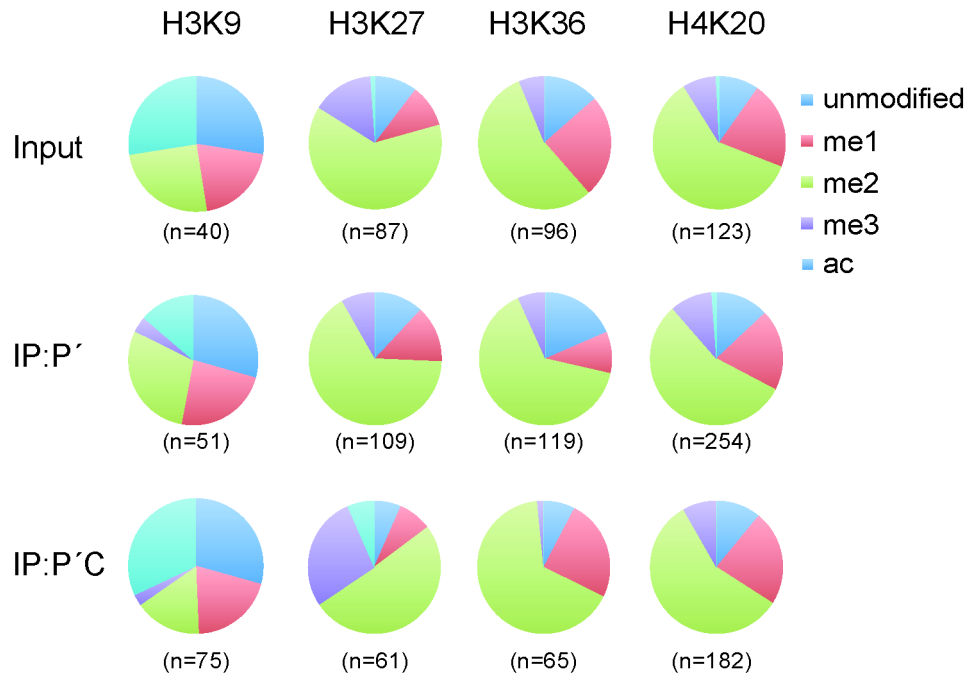

**Figure S3. Frequencies of each histone modification in P'- and P'C-bound nucleosomes.**

The histone proteins coprecipitated with P' (IP:P') and P'C (IP:P'C) were analyzed by mass spectrometry. Bulk histones (Input) were also analyzed for comparison. The frequencies of different modification status detected by mass spectrometry analysis were expressed in the pie charts. n, number of peptides analyzed. It should be noted that modifications of histones may affect the digestion efficiency by trypsin in the sample preparation procedure and therefore the frequencies shown above may not faithfully reflect the actual ratio of each modification.

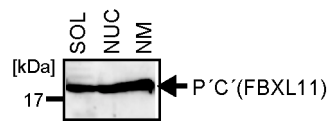

**Figure S4.** Subcellular distribution of the **P'C' (FBXL11) mutant**

Experiment was performed as in Figure 2E. The P'C' (FBXL11) mutant was visualized by anti-FLAG antibody.

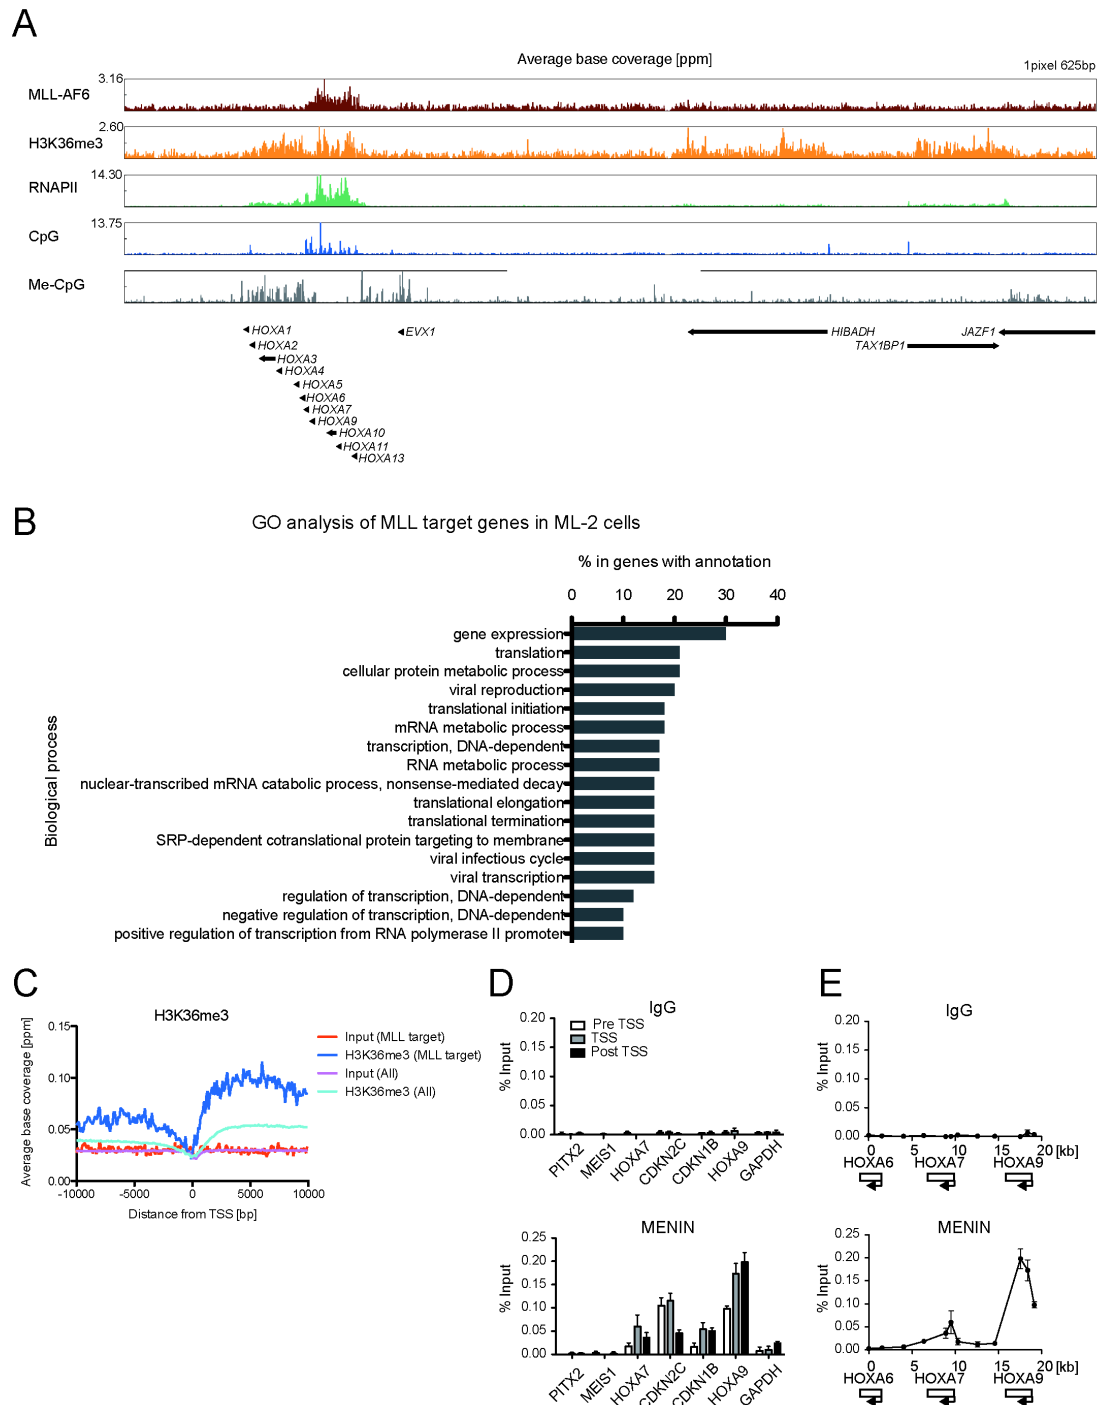

**Figure S5. Profiles of the MLL target genes in ML-2 cells**

- A. Representative results of ChIP-seq for MLL-AF6, H3K36me3, and RNAPII and CIRA/MIRA-seq for non-methylated CpGs (CpG) and methylated CpGs (Me-CpG) at the *HOXA* cluster are shown with the locations of genes.
- B. Gene ontology (GO) analysis of MLL-AF6 target genes in ML-2 cells. The GO file was downloaded from the GO web site (<http://www.geneontology.org/>), and the

biological process GO term enrichment in the MLL-AF6 target gene set with annotation was plotted.

- C. Average distribution of H3K36me3 at the 154 MLL-AF6-occupied TSSs. The input data and all TSS data are included for comparison. Analysis was performed as in Figure 6A.
- D. Genomic localization of menin in ML-2 cells at various gene loci. Analysis was performed as in Figure 6B. IgG control is shown for comparison.
- E. Genomic localization of menin in ML-2 cells at the posterior *HOXA* loci. Analysis was performed as in Figure 6C. IgG control is shown for comparison.

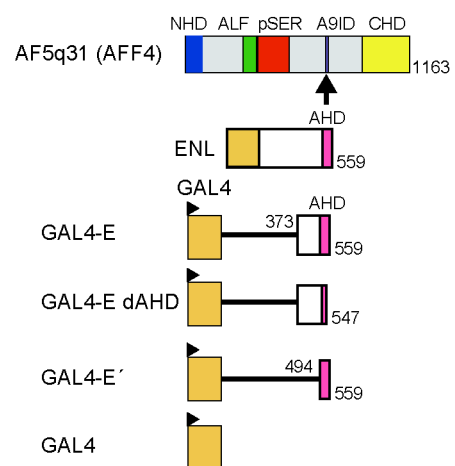

**Figure S6. Schematic representation of the GAL4-ENL fusion proteins**

**Table S1. List of MLL-AF6 target genes in ML-2 cells**

|                  |                |                  |                     |                |               |               |
|------------------|----------------|------------------|---------------------|----------------|---------------|---------------|
| <i>AIMP1</i>     | <i>CCDC103</i> | <i>FDFT1</i>     | <i>HOXA9</i>        | <i>PDLIM2</i>  | <i>RPL8</i>   | <i>TCF4</i>   |
| <i>ANP32E</i>    | <i>CCDC56</i>  | <i>FOXD4L1</i>   | <i>JMJD1C</i>       | <i>POLR2A</i>  | <i>RPL9</i>   | <i>THAP9</i>  |
| <i>APOLD1</i>    | <i>CDC2L5</i>  | <i>FOXP1</i>     | <i>LOC100216545</i> | <i>PPIL5</i>   | <i>RPLP1</i>  | <i>TIMM13</i> |
| <i>ATF4</i>      | <i>CDKN1B</i>  | <i>FUS</i>       | <i>LOC153684</i>    | <i>PPP1R10</i> | <i>RPLP2</i>  | <i>TMED1</i>  |
| <i>ATF5</i>      | <i>CDKN2C</i>  | <i>GAS5</i>      | <i>LOC401093</i>    | <i>PSMG2</i>   | <i>RPS15A</i> | <i>TOM1</i>   |
| <i>BAT1</i>      | <i>CENPL</i>   | <i>GFI1</i>      | <i>LZTR1</i>        | <i>PTPN6</i>   | <i>RPS18</i>  | <i>TRPS1</i>  |
| <i>BAT2</i>      | <i>CEP76</i>   | <i>GGA3</i>      | <i>MBNL1</i>        | <i>PTPRK</i>   | <i>RPS23</i>  | <i>TXN2</i>   |
| <i>BAT3</i>      | <i>CNTD1</i>   | <i>GLMN</i>      | <i>MED22</i>        | <i>RASSF1</i>  | <i>RPS3A</i>  | <i>VPS52</i>  |
| <i>BAT4</i>      | <i>COMMD3</i>  | <i>GNB2L1</i>    | <i>MGAT2</i>        | <i>REEP3</i>   | <i>RUNX2</i>  | <i>YWHAE</i>  |
| <i>BLCAP</i>     | <i>CTAGE5</i>  | <i>HADHA</i>     | <i>MLL5</i>         | <i>RPAP2</i>   | <i>SATB1</i>  | <i>ZBTB4</i>  |
| <i>BRD2</i>      | <i>DACH1</i>   | <i>HADHB</i>     | <i>MLLT10</i>       | <i>RPL10A</i>  | <i>SEC31A</i> | <i>ZNF335</i> |
| <i>BUD31</i>     | <i>DARS2</i>   | <i>HEXIM1</i>    | <i>MPO</i>          | <i>RPL12</i>   | <i>SERBP1</i> |               |
| <i>C10orf140</i> | <i>DLX-AS</i>  | <i>HNRNPA1</i>   | <i>MRPS7</i>        | <i>RPL21</i>   | <i>SF3B14</i> |               |
| <i>C11orf58</i>  | <i>DLX5</i>    | <i>HNRNPH1</i>   | <i>MYC</i>          | <i>RPL23</i>   | <i>SFRS1</i>  |               |
| <i>C19orf48</i>  | <i>DLX6</i>    | <i>HNRNPK</i>    | <i>NDUFA4</i>       | <i>RPL31</i>   | <i>SFRS7</i>  |               |
| <i>C5orf39</i>   | <i>EFTUD2</i>  | <i>HOXA10</i>    | <i>NDUFA4L2</i>     | <i>RPL36AL</i> | <i>SIN3A</i>  |               |
| <i>C7orf55</i>   | <i>EIF3D</i>   | <i>HOXA11</i>    | <i>NUP62</i>        | <i>RPL37</i>   | <i>SLBP</i>   |               |
| <i>C9orf64</i>   | <i>EIF4A1</i>  | <i>HOXA11-AS</i> | <i>NUP85</i>        | <i>RPL6</i>    | <i>SNHG6</i>  |               |
| <i>CALM2</i>     | <i>EMB</i>     | <i>HOXA13</i>    | <i>PCBP1</i>        | <i>RPL7</i>    | <i>SUPT3H</i> |               |
| <i>CBX5</i>      | <i>FAM169A</i> | <i>HOXA7</i>     | <i>PDAP1</i>        | <i>RPL7A</i>   | <i>TBCK</i>   |               |

**Table S2. Antibodies used in this study**

| Epitope       | Maker/Reference      | ID/Product no. | Application  |
|---------------|----------------------|----------------|--------------|
| Histone H2B   | Abcam                | ab1790         | WB           |
| Histone H3    | Abcam                | ab1791         | WB           |
| Histone H3    | Active Motif         | 39163          | WB           |
| H3K36me1      | Abcam                | ab9048         | WB           |
| H3K36me2      | Cell Signaling       | 9758           | WB           |
| H3K36me2      | Abcam                | ab9049         | ChIP         |
| H3K36me3      | Abcam                | ab9050         | ChIP, WB     |
| H3K27me3      | Millipore            | 07-449         | WB           |
| H3K27ac       | Abcam                | ab4179         | WB           |
| H3K4me2       | Abcam                | ab7766         | ChIP, WB     |
| FLAG          | Sigma                | F-7425         | WB           |
| FLAG          | Sigma                | M2             | ChIP, IP, WB |
| Xpress        | Santa Cruz Biotech.  | M-21/sc-499    | WB           |
| Xpress        | Santa Cruz Biotech.  | D-8/sc-7270    | IP           |
| LEDGF         | Bethyl laboratories  | A300-848A      | ChIP         |
| RNAPII        | Millipore            | CTD4H8/05-623  | WB, ChIP     |
| RNAPII P-Ser2 | Abcam                | ab5095         | WB           |
| Tubulin, beta | Santa Cruz Biotech.  | sc-9104        | WB           |
| ENL           | Yokoyama et al. 2010 | ENL-3.1        | WB           |
| MLL           | Yokoyama et al. 2010 | rpN1           | ChIP         |
| Menin         | Bethyl laboratories  | A300-105A      | ChIP         |
| AF5q31        | Bethyl laboratories  | A302-538A      | WB           |
| p300          | Bethyl laboratories  | A300-358A      | WB           |
| (Rabbit IgG)  | Millipore            | pp64B          | ChIP         |

**Table S3. Custom-made probes used for ChIP- and CIRA-qPCR in this study**

| Position           | Fwd primer seq                  | Rev primer seq                        | Reporter seq      |
|--------------------|---------------------------------|---------------------------------------|-------------------|
| CDKN1B<br>TSS      | GGGTCTGTGTCTTTTGGCT             | GCCCGAACCCTCTCG                       | CCAGCGACTGCCCTC   |
| CDKN1B<br>Pre TSS  | GTCCCGAGGGTCCCTTC               | GTGTGCCTACCTCATCTCATACG               | CAGCTGTCACATTCTG  |
| CDKN1B<br>Post TSS | GCTTTGGGAGAGCTAACTTTATTG<br>GT  | CGGATCTTACCATCTCCAGTTTC<br>TG         | ACCTGGCCCACTGCTT  |
| CDKN2C<br>TSS      | GGCGGTGCCCTGT                   | CCCGGTGCCACTTTGC                      | CTGTGCCCTTTGCTG   |
| CDKN2C<br>Pre TSS  | CTCCACAACCGTCTTAAATAACAA<br>ACC | GCGGGCTTGAGTCTGTGA                    | CAGTGCCCCAATTC    |
| CDKN2C<br>Post TSS | CTGTGGAGTCGTCAGAATTCTTCA<br>T   | CGATTACACGTGATTATTCAG<br>CAAA         | CCTCGCTCGCTTTT    |
| EVI-1<br>Pre TSS   | TCACCAGACAGTCATCAATCTCTC<br>T   | GAAGGGCGTGCAAAATTTTCAA<br>AC          | CCCGCCAAACAGCAT   |
| EVI-1<br>TSS       | GCTGCGGAGGATCTGAAAGG            | CTCCTTCCCAGTTCCAATGGG                 | CAGGAGGAGGAGAGTTT |
| EVI-1<br>Post TSS  | CACCACCTTCATCTCTTTAGCAT         | TGGCAGCTTCTGGAGATATAA<br>AAG          | AAGCTGAGATTTTCCC  |
| GAPDH<br>TSS       | CCACATCGCTCAGACACCAT            | GCGAACTACCCGTTGACT                    | CCGACCTTCACCTTCC  |
| GAPDH<br>Pre TSS   | CCCCTCCTAGGCCTTTGC              | GCTGAGAGGCGGGAAAGTT                   | ACTACCGCAGAGCCTC  |
| GAPDH<br>Post TSS  | GGCTCTCTCCCATCCCTTCT            | AGGAGTGGGAGCACAGGTAA                  | CCCCACACACATGCAC  |
| HOXA6<br>Pre TSS   | AACTCGCACCCACGAATAGG            | GCAGTGACAAAGGTGGCTTT                  | CCTGCCGGCCTGCACT  |
| HOXA6<br>-2.5kb    | GCCTATATGGCCGGGAAATCT           | GTCCAGCTCCGGTCAGG                     | CCCCGCCTCGGCTAC   |
| HOXA6<br>Post TSS  | TTCCAGTGTCTCCCCAAAGC            | GGAGATGAGGGAGGAGAGAGA<br>AAA          | CAGCCCCAGACTCAG   |
| HOXA7<br>Pre TSS   | GCCTTCCCCGTCTGGAT               | ACTCTGCCCAAGTCTTCTCTCA                | CAGGCCGGAAGTAGAC  |
| HOXA7<br>Post TSS  | TGCCAGGGTCCATTTCAAGATG          | CCCTCATCCCCAGGACCTT                   | CTCTGTCTCATTCCC   |
| HOXA7<br>-2.5kb    | CTAGGGATCACTCACTACTGGAT         | AGGCAAATTGCTTCTTAAAGGT<br>TTC         | CACCCTTGCTCTCTC   |
| HOXA7<br>TSS       | GACGCCTACGGCAACCT               | GCCTTTGGCGAGGTCCT                     | CCCTGCGCCTCTAC    |
| HOXA7<br>+4kb      | CCAGAGCTGATTCCGGATTCTG          | CCTCGCCTGGTCTGCA                      | CCCTGAACCCAGCCCC  |
| HOXA9<br>Pre TSS   | TGGCTGCTTTTTTATGGCTTCAAT<br>T   | CCGCGTGCGAGTGC                        | CCCCTCACATAAAATT  |
| HOXA9<br>TSS       | TCACCACCACCCCTACGT              | GCAAGCCCGCAAGGA                       | CAGGAGCGCATGTACC  |
| HOXA9<br>Post TSS  | AGTGGCGGCGTAAATCCT              | TGATCACGTCTGTGGCTTATTTG<br>AA         | CCCGCAGCCTCATC    |
| HOXA9<br>+5kb      | GGATATTCCACCAAAGCCCTTTCA<br>T   | GGCAATGCCAATAAAAGAGGTG<br>TTT         | CTGCCGCCGATAAAG   |
| MEIS1<br>TSS       | TTTGCTTCAGGTCCCGTAGAC           | CCTTAACGTCTCCAGCAACGT                 | ACTGGTCCCAGATCTT  |
| MEIS1<br>Pre TSS   | CGGCGTTGATTCCCAATTTATTTT<br>A   | CACACAAACGCAGGCAGTAG                  | CCGCCAGCTTTATTTT  |
| MEIS1<br>Post TSS  | TCTCAGCGCTCCAAATCTTG            | TTTGTGTGTGTGAAATTTAGCTA<br>TTTAGGTTTT | CCAGGCAGTTATTTTC  |
| PITX2<br>Pre TSS   | CGGTGTCCAGCTAAGCT               | CGAACGAGCTAGGCTTGTC                   | CAGCGTCCCGGCCTT   |
| PITX2<br>TSS       | AGAGAGAGTGCGAGACCGA             | GCCACTGGCAGTTTCTTCTG                  | CCTCTCAGCTTCTC    |
